# Supplementary material for: Ultra-Long-Term Delivery of Hydrophilic Drugs Using Injectable In Situ Cross-Linked Depots
Source: PubMed Central journal article supplement (PMC11382995; doi:10.1101/2023.11.04.565631), 2024-08-28
Supplement: media-1.pdf [file media-1.pdf]

## Ultra-Long-Term Delivery of Hydrophilic Drugs Using Injectable *In Situ* Cross-Linked Depots

Sohyung Lee<sup>1,2,3†</sup>, Spencer Zhao<sup>2,3†</sup>, Weihua Jiang<sup>4</sup>, Xinyang Chen<sup>2,3</sup>, Lingyun Zhu<sup>2,3</sup>, John Joseph<sup>1,2,3</sup>, Eli Agus<sup>2,3</sup>, Helna Baby Mary<sup>2,3</sup>, Shumaim Barooj<sup>2,3</sup>, Kai Slaughter<sup>2,3</sup>, Krisco Cheung<sup>2,3</sup>, James N Luo<sup>1,5</sup>, Chetan Shukla<sup>2,3</sup>, Jingjing Gao<sup>1,2,3,6</sup>, Dongtak Lee<sup>1,2,3</sup>, Biji Balakrishnan<sup>7</sup>, Christopher Jiang<sup>2,3</sup>, Amogh Gorantla<sup>2,3</sup>, Sukyung Woo<sup>4\*</sup>, Jeffrey M Karp<sup>1,2,8,9,10\*</sup> and Nitin Joshi<sup>1,2,3\*</sup>

<sup>1</sup> Harvard Medical School, Boston, MA, USA

<sup>2</sup> Center for Accelerated Medical Innovation, Department of Anesthesiology, Perioperative and Pain Medicine, Brigham and Women's Hospital, Boston, MA 02115, USA

<sup>3</sup> Center for Nanomedicine, Department of Anesthesiology, Perioperative and Pain Medicine, Brigham and Women's Hospital, Boston, MA, USA

<sup>4</sup> Department of Pharmaceutical Sciences, School of Pharmacy and Pharmaceutical Sciences, The State University of New York at Buffalo, Buffalo, NY 14215, USA

<sup>5</sup> Department of Surgery, Brigham and Women's Hospital, Boston, MA 02115, USA

<sup>6</sup> College of Engineering, University of Massachusetts Amherst, MA, USA

<sup>7</sup> Somaiya Centre for Integrated Science education and research, SKSC, Somaiya Vidyavihar University, Mumbai, 400077, India

<sup>8</sup> Harvard–Massachusetts Institute of Technology Division of Health Sciences and Technology, Massachusetts Institute of Technology, Cambridge, MA 02139, USA

<sup>9</sup> Broad Institute, Cambridge, MA 02142, USA.

<sup>10</sup> Harvard Stem Cell Institute, Cambridge, MA 02138, USA

†Equal contribution

\*Corresponding authors: S.W. (skwoo@buffalo.edu) , J.M.K. (jmkarp@bwh.harvard.edu) and N.J. (njoshi@bwh.harvard.edu)

28 **This PDF file includes:**

29 **Supplementary Figure 1 to 13**

30 **Supplementary Tables 1 to 6**

31

32

33

34

35

36

37

38

39

40

41

42

43

44

45

46

47

48

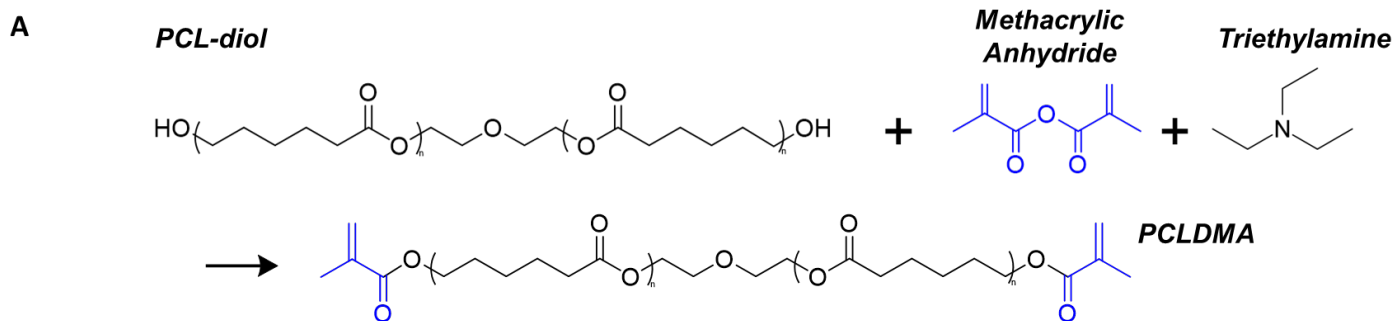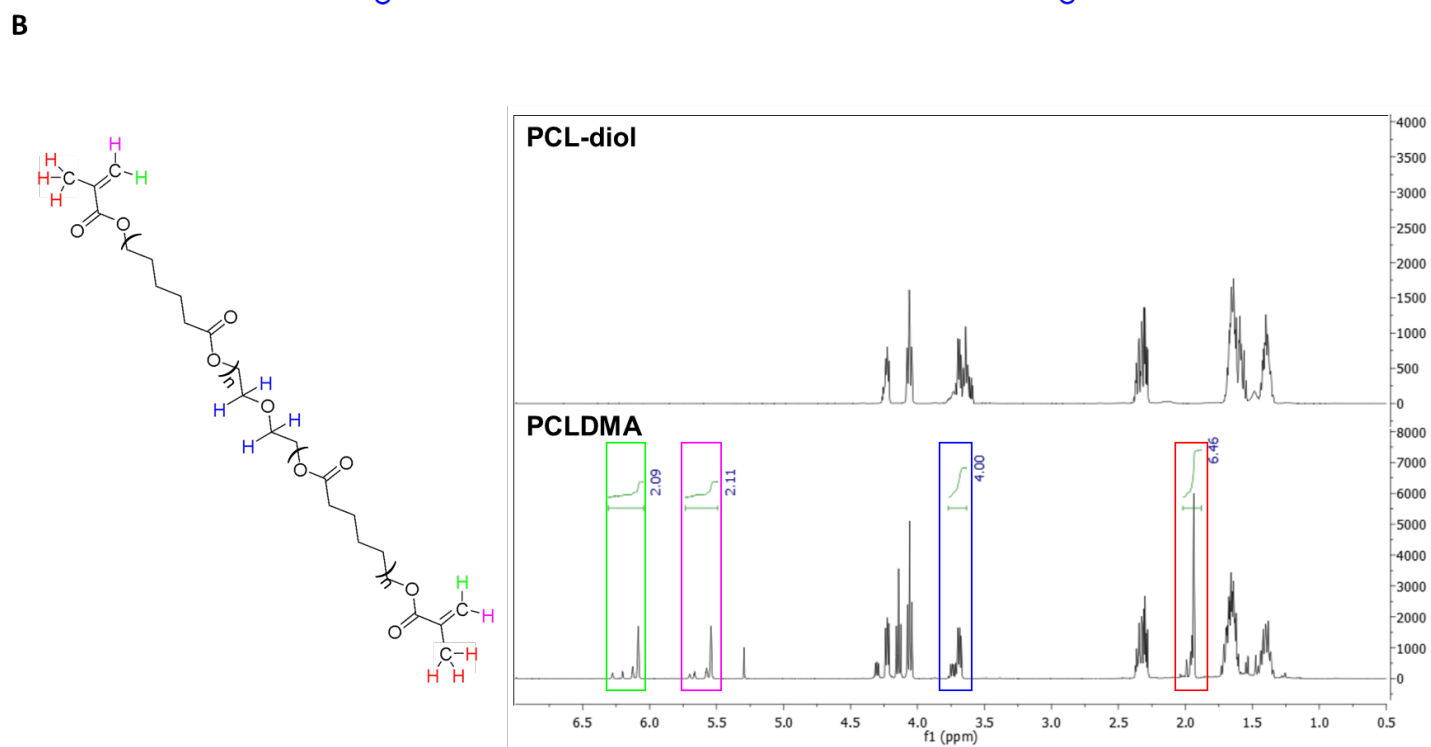

50

51 **Figure S1. Synthesis and characterization of PCLDMA.** **A.** Schematic showing methacrylation of hydroxyl-  
 52 functionalized PCL to yield PCLDMA. **B.**  $^1\text{H-NMR}$  spectrum of PCLDMA. The chemically equivalent protons  
 53 are labeled with the same color and their NMR signals are marked with the same colored box for ease of  
 54 understanding. The NMR integration of each signal corresponds to the expected ratio of each type of hydrogen  
 55 in the PCLDMA molecule.

56

57

58

59

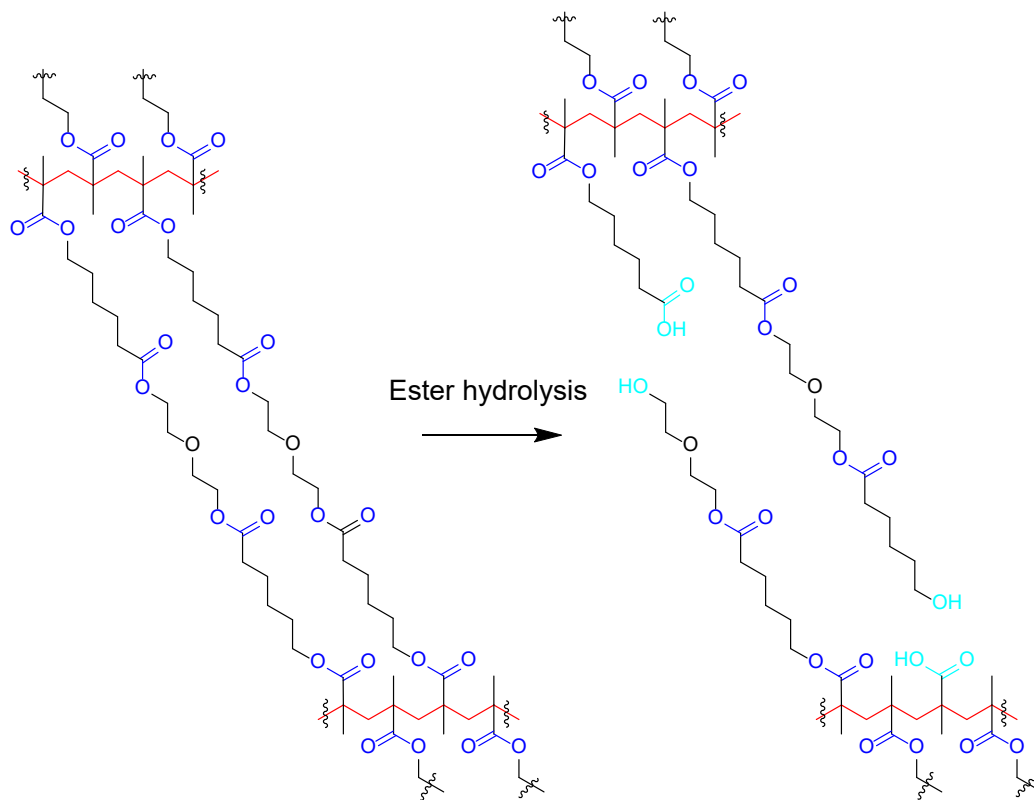

60

61 **Figure S2.** Schematic illustrating hydrolysis of polycaprolactone domains and subsequent collapse of ISCD. The  
 62 ISCD consists of a cross-linked network of polymethacrylate chains (red) connected by ester bonds (dark blue).  
 63 Hydrolysis of these ester bonds (light blue) disconnects the polymethacrylate chains, enabling the depot to  
 64 degrade.

65

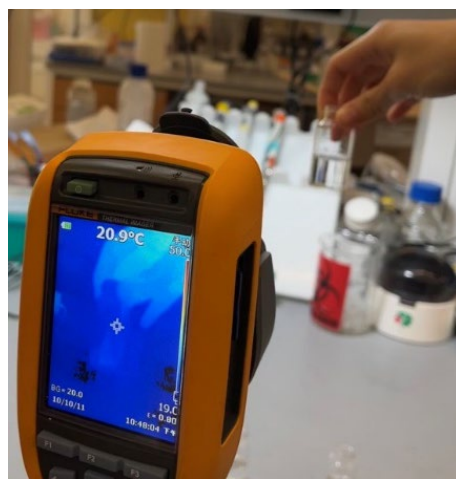

66

67 **Figure S3.** Infrared thermal imaging confirms that there is no noticeable heat generated during ISCD  
 68 polymerization.

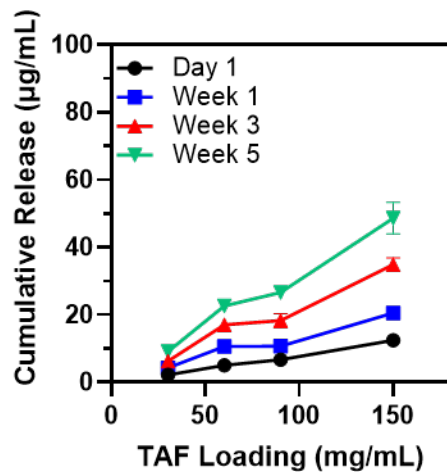

69  
70 **Figure S4.** *In vitro* cumulative release of TAF from ISCD loaded with different concentrations of TAF and  
71 incubated in PBS (37°C). Data are presented as mean  $\pm$  standard deviation (n=3, experiments performed at least  
72 twice).

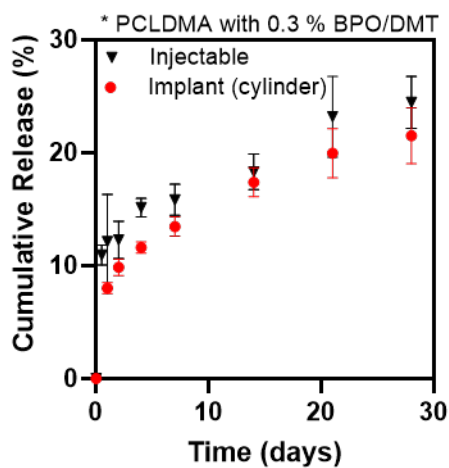

75  
76 **Figure S5.** *In vitro* cumulative release of TAF from ISCD depots formed by injecting pre-polymer mixture into  
77 PBS (37°C) compared with TAF release from pre-formed implants with cylindrical shape. Data are presented as  
78 mean  $\pm$  standard deviation (n=3, experiments performed at least twice).

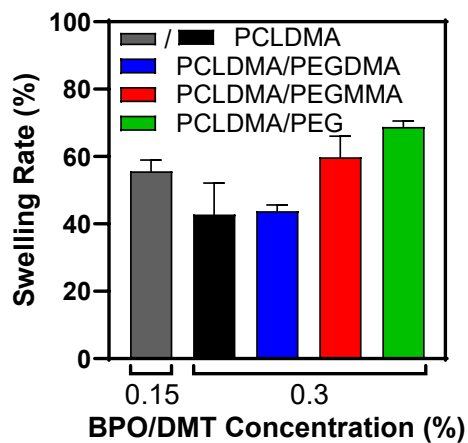

**Figure S6.** Swelling rate of different ISCD formulations studied in benzyl alcohol after a week. Data are presented as mean  $\pm$  standard deviation (n=3, experiments performed at least twice).

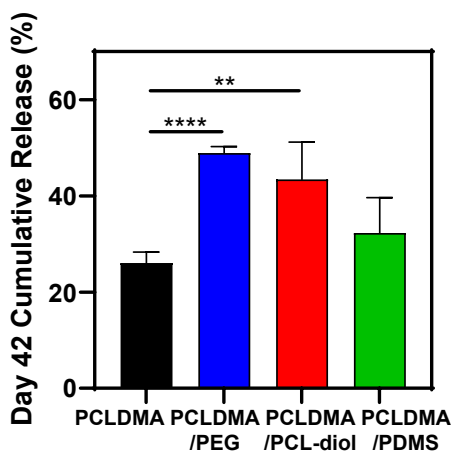

**Figure S7.** Cumulative release of TAF at day 42 post-incubation of different ISCD formulations in PBS (37°C). (\*\*P<0.01, \*\*\*\*P<0.0001). Data are presented as mean  $\pm$  standard deviation (n=3). The P-value was determined using one-way ANOVA with Tukey's post hoc analysis.

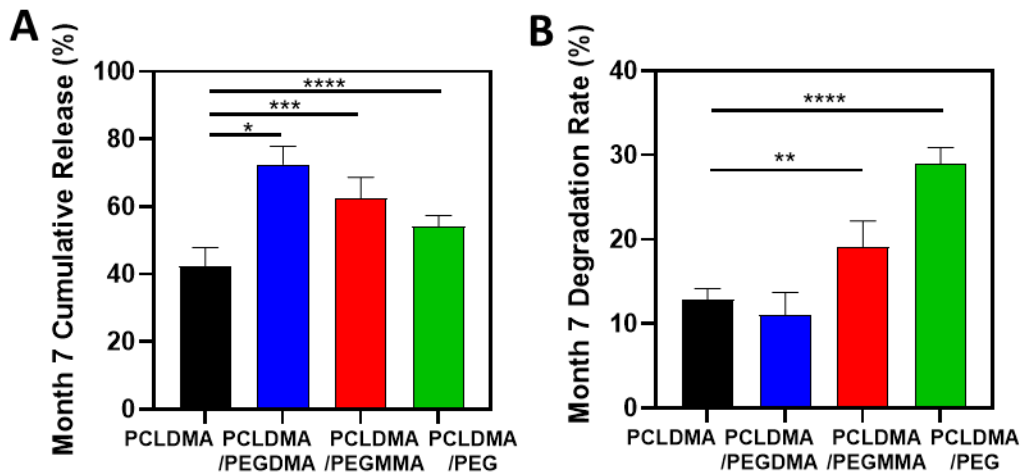

**Figure S8. Impact of incorporating external polymer additives with varying degrees of methacrylation into ISCD on TAF release and depot degradation. A.** Month 7 cumulative release, and **B.** month 7 degradation rate of unmodified ISCD and ISCD containing 25 wt% of PEGs with different degree of methacrylation, when incubated in PBS (37°C). (\* $P < 0.05$ , \*\* $P < 0.01$ , \*\*\* $P < 0.001$ , \*\*\*\* $P < 0.0001$ ). Data are presented as mean  $\pm$  standard deviation ( $n=3$ ). The  $P$ -value was determined using one-way ANOVA with Tukey's post hoc analysis.

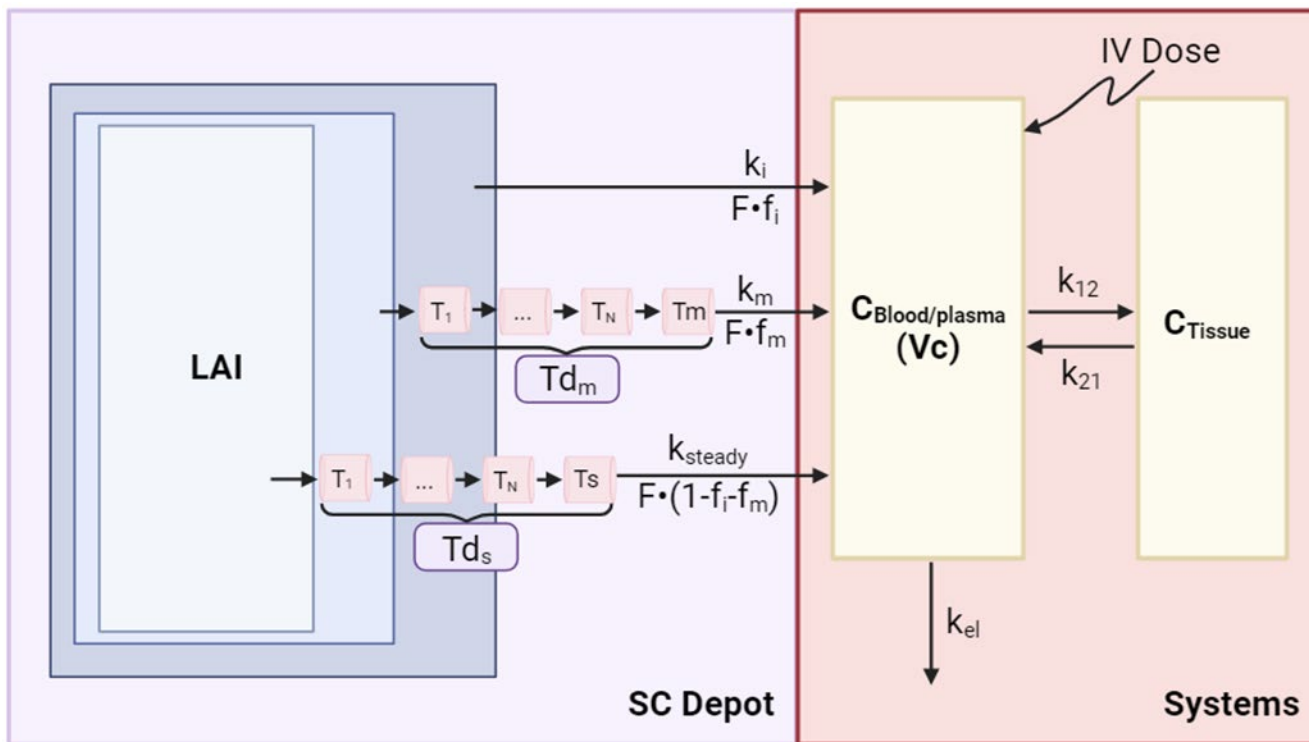

**Figure S9. The scheme of the pharmacokinetic (PK) model for subcutaneous injection of ISCD.** The disposition kinetics (referred to as Systems) of analytes is characterized by two compartments ( $C_{\text{Blood/Plasma}}$  and  $C_{\text{Tissue}}$ ), with first-order rate constants for elimination ( $k_{el}$ ), distribution ( $k_{12}$ ), and redistribution ( $k_{21}$ ), and  $V_c$  for the central volume of distribution. At the SC implant site (referred to as SC Depot), the release/absorption model assumes three sequential release phases, delineated by first-order release rate constants ( $k_i$ ,  $k_m$ ,  $k_s$ ). Initially, a fraction ( $f_i$ ) of the ISCD implant is released ( $k_i$ ), leading to the maximum concentration in the central compartment. Subsequently, drug release continues with an intermediate phase ( $k_m$ ) for a fraction of the total released drug mass ( $f_m$ ), followed by a sustained release phase ( $k_s$ ) for the remaining drug amount ( $1 - f_i - f_m$ ). The time delays associated with the intermediate ( $T_{dm}$ ) and sustained-release ( $T_{ds}$ ) phase are characterized by a gamma distribution function with shape ( $N$ ) and rate parameter ( $T_d$ ).  $F$  represents the bioavailability of ISCD implants.



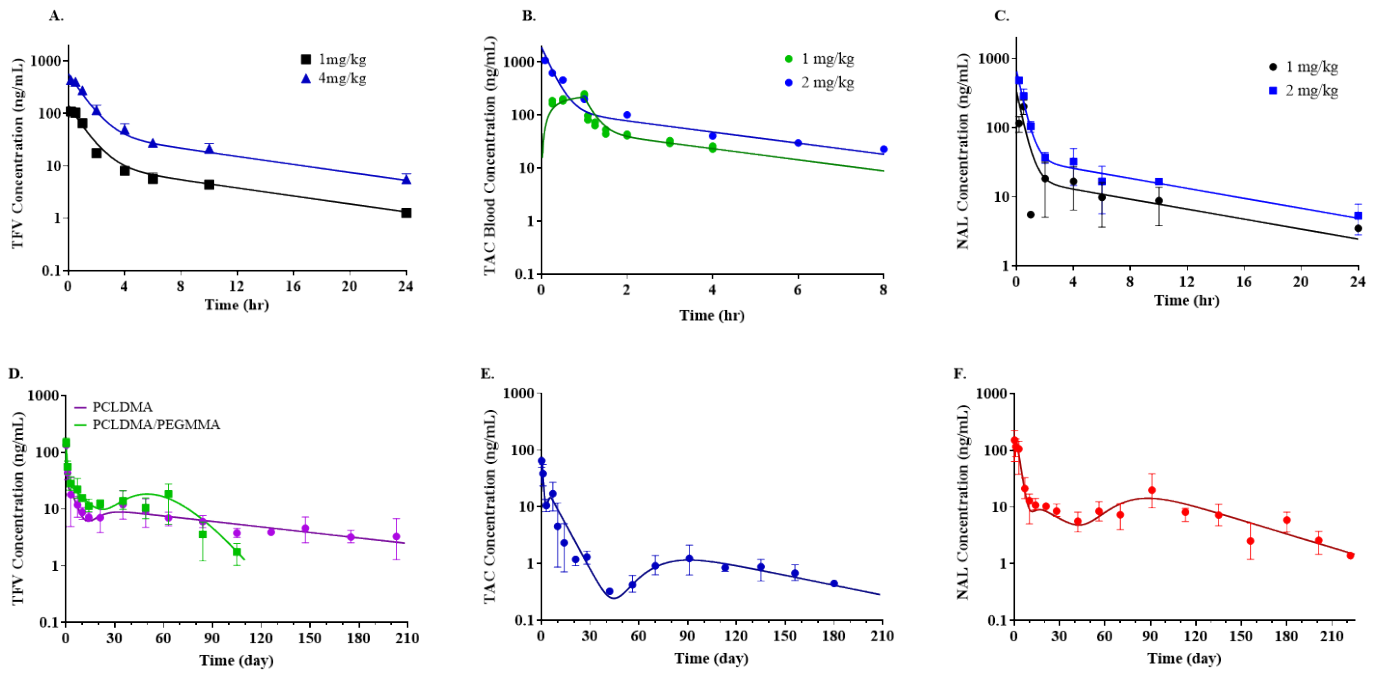

126  
 127 **Figure S10.** Time profiles of the blood/plasma concentration in rats after a single IV dose of **A.** TFV (1 & 4 mg/kg)  
 128 **B.** TAC (1 & 2 mg/kg), and **C.** NAL (1 & 2 mg/kg). Time profiles of the blood/plasma concentration in rats after  
 129 subcutaneous injection of ISCD containing **D.** TFV, **E.** TAC, and **F.** NAL. Data presented as symbols reflect the  
 130 mean  $\pm$  standard deviation of three technical repeats (n=3). Lines represent the model-predicted drug  
 131 concentrations.

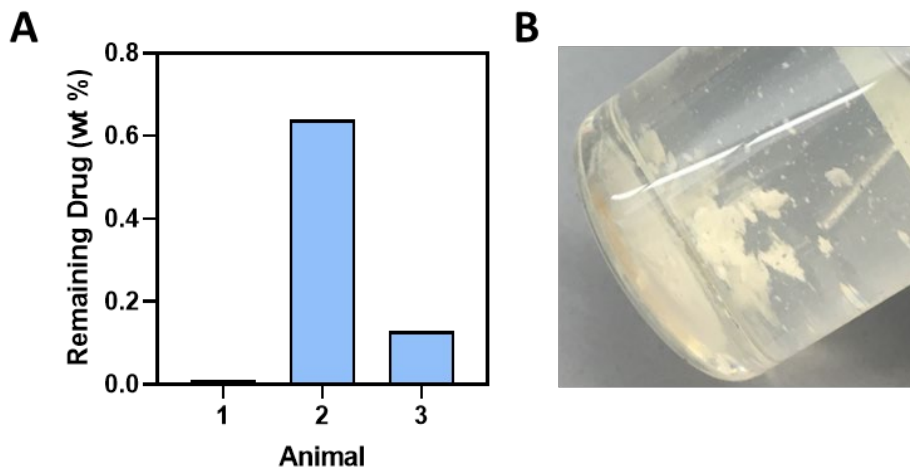

**Figure S11 A.** Percentage of the initial amount TAF amount remaining in the explanted ISFI following the 2-month *in vivo* study in rats. B. ISFI explanted after the 2-month *in vivo* study is a fragmented solid. Data are presented as individual values for each animal.

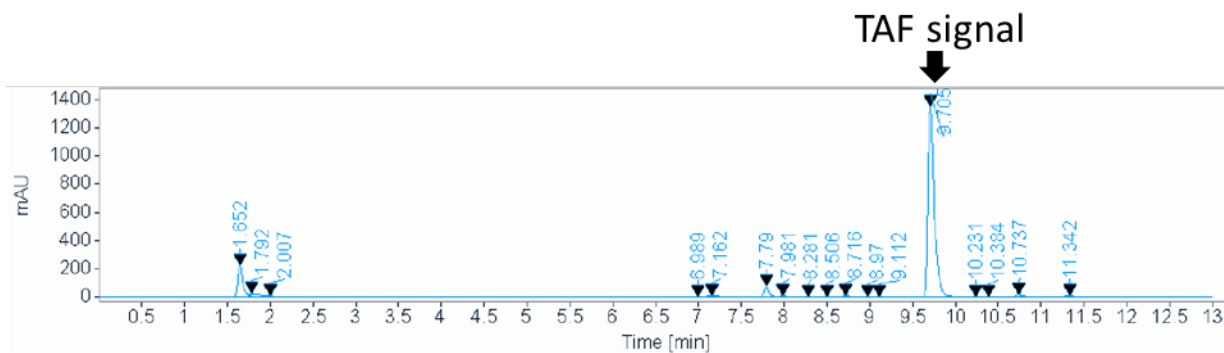

**Figure S12.** HPLC chromatogram of TAF-loaded ISCD explanted after a 7-month *in vivo* study.

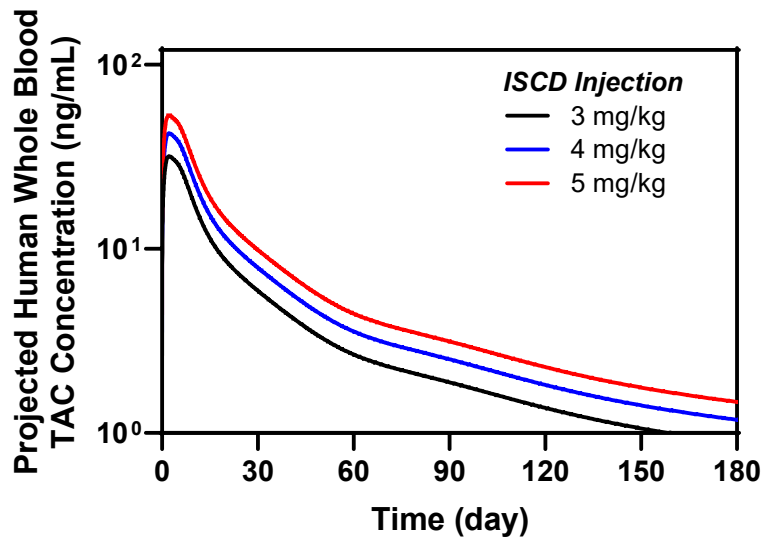

151

152 **Figure S13.** Convolution analysis-based prediction of human PK of a single subcutaneous dose of TAC-loaded  
153 ISCD (at different dosages) upto 6 months.

154

155

156

157

158

159

160

161

162

163

164

165

166 **SUPPLEMENTARY TABLES**167 **Table S1. Initial burst release against water solubility of therapeutics**

| <b>Drug</b> | <b>Solubility (mg/ml)</b> | <b>Cumulative release after 24 h (%)</b> |
|-------------|---------------------------|------------------------------------------|
| FTC         | 112                       | 18.51                                    |
| NAL         | 100                       | 22.02                                    |
| LAM         | 70                        | 14.5                                     |
| VAN         | 50                        | 14.98                                    |
| TAF         | 5.63                      | 12.14                                    |
| AMX         | 3                         | 0.79                                     |
| ABC         | 1.21                      | 6.04                                     |
| TAC         | 0.004                     | 1.34                                     |

168

169

170

171

172

173

174

175

176

177

178 **Table S2.** The estimated PK parameters of disposition and release kinetics were obtained from the  
 179 concentration-time profiles following IV administration and SC implants of ISCDs in rats.

| Parameters                   | Definition                                                                    | PCLDMA<br>+TAF        | PCLDMA/<br>PEGMMA<br>+TAF | PCLDMA<br>+TAC  | PCLDMA<br>+NAL  |
|------------------------------|-------------------------------------------------------------------------------|-----------------------|---------------------------|-----------------|-----------------|
| <i>Disposition Kinetics</i>  |                                                                               |                       |                           |                 |                 |
| <b>V<sub>c</sub> (mL)</b>    | Central compartment volume                                                    | 1266 (9) <sup>a</sup> |                           | 306 (17)        | 923 (20)        |
| <b>k<sub>el</sub> (1/hr)</b> | Elimination rate constant                                                     | 0.558 (8)             |                           | 2.06 (16)       | 0.925 (17)      |
| <b>k<sub>12</sub> (1/hr)</b> | Transfer rate constant from central to peripheral compartment                 | 0.372 (15)            |                           | 2.08 (21)       | 1.22 (19)       |
| <b>k<sub>21</sub> (1/hr)</b> | Transfer rate constant from peripheral to central compartment                 | 0.158 (12)            |                           | 0.517 (21)      | 0.203 (17)      |
| <b>t<sub>1/2</sub> (hr)</b>  | Terminal elimination half-life                                                | 7.88                  |                           | 2.87            | 8.35            |
| <b>CL (L/hr)</b>             | Total systemic clearance                                                      | 707                   |                           | 631             | 853             |
| <i>Release Kinetics</i>      |                                                                               |                       |                           |                 |                 |
| <b>k<sub>i</sub> (1/day)</b> | Initial release rate constant                                                 | 2.47 (27)             | 2.52 (25)                 | 0.962 (43)      | 0.372 (13)      |
| <b>f<sub>i</sub></b>         | Fraction of the released drug mass associated with k <sub>i</sub>             | 0.058 (18)            | 0.079 (17)                | 0.231 (26)      | 0.274 (11)      |
| <b>k<sub>m</sub> (1/day)</b> | Intermediate release rate constant                                            | 0.178 (34)            | 0.0643 (27)               | 0.122 (8)       | 0.0346 (64)     |
| <b>f<sub>m</sub></b>         | Fraction of the released drug mass associated with k <sub>m</sub>             | 0.092 (18)            | 0.315 (16)                | 0.413 (15)      | 0.154 (38)      |
| <b>T<sub>dm</sub> (day)</b>  | Mean transit time for drug release associated with k <sub>m</sub>             | 1.5 <sup>b</sup>      | 1 <sup>b</sup>            | 3.7 (29)        | 11.8 (24)       |
| <b>N<sub>m</sub></b>         | Number of transit compartment for drug release associated with k <sub>m</sub> | 5 <sup>b</sup>        | 5 <sup>b</sup>            | 10 <sup>b</sup> | 10 <sup>b</sup> |
| <b>k<sub>s</sub> (1/day)</b> | Sustained release rate constant                                               | 0.00744 (16)          | 0.128                     | 0.0134 (28)     | 0.0181 (16)     |
| <b>T<sub>ds</sub> (day)</b>  | Mean transit time for drug release associated with k <sub>s</sub>             | 18.1 (23)             | 50.8 <sup>b</sup>         | 68.3 (7)        | 70.1 (9)        |
| <b>N<sub>s</sub></b>         | Number of transit compartment for drug release associated with k <sub>s</sub> | 5 <sup>b</sup>        | 6 <sup>b</sup>            | 15 <sup>b</sup> | 15 <sup>b</sup> |
| <b>F<sub>total</sub></b>     | Projected total bioavailability of ISCD                                       | 1 <sup>b</sup>        | 0.86 (7)                  | 0.38 (7)        | 1 <sup>b</sup>  |
| <b>F<sub>tlast</sub></b>     | Fraction of the total drug mass until the last observed concentration         | 0.80                  | 0.86                      | 0.35            | 0.97            |

180 <sup>a</sup> Coefficient of Variability (CV)%; <sup>b</sup> Fixed parameters

181

182

183 **Table S3.** The disposition PK parameter values obtained from the concentration-time profiles of TAC (0.075  
 184 mg/kg/day) and NAL (1 mg) following oral or IV administration in humans.

| Parameter (unit)       | TAC   | NAL  |
|------------------------|-------|------|
| CL (L/hr)              | 3.3   | 248  |
| V <sub>ss</sub> (L)    | 101   | 563  |
| k <sub>12</sub> (1/hr) | 0.276 | 3.1  |
| k <sub>21</sub> (1/hr) | 0.131 | 1.84 |
| t <sub>1/2</sub> (hr)  | 24.8  | 1.83 |

185

186 **Table S4. HPLC method details for different therapeutics**

| Therapeutic compound | Flow rate (mL/min) | Retention time (min) | Mobile phase                                      | Gradient elution | Detection wavelength (nm)     | Injection volume (μL) |
|----------------------|--------------------|----------------------|---------------------------------------------------|------------------|-------------------------------|-----------------------|
| TAC                  | 1                  | 19                   | methanol/DI water (70:30 v/v)                     | Table S5         | 210                           | 20                    |
| LAM, ABC, NAL        | 0.45               | 13                   | 10mM ammonium formate buffer/ACN (95:5 v/v)       | Table S6         | 220-NAL<br>259-ABC<br>271-LAM | 5                     |
| AMX                  | 1                  | 8                    | 25 mM phosphate buffer/ACN (95:5 v/v)             | None             | 240                           | 20                    |
| VAN                  | 1                  | 8                    | 20mM ammonium acetate buffer/methanol (88:12 v/v) | None             | 240                           | 20                    |

187

188 **Table S5. Gradient program of the mobile phase for HPLC analysis of TAC**

| Time (min) | Mobile Phase |           |
|------------|--------------|-----------|
|            | Methanol (%) | Water (%) |
| 3          | 70           | 30        |
| 15         | 90           | 10        |
| 16         | 90           | 10        |
| 16.1       | 70           | 30        |
| 19         | 70           | 30        |

189

190 **Table S6. Gradient program of the mobile phase for HPLC analysis of LAM, ABA, and NAL**

| Time<br>(min) | Mobile Phase    |              |
|---------------|-----------------|--------------|
|               | Methanol<br>(%) | Water<br>(%) |
| 2             | 95              | 5            |
| 3             | 95              | 5            |
| 7             | 40              | 60           |
| 8             | 40              | 60           |
| 8.1           | 95              | 5            |
| 3             | 95              | 5            |

191

192

193
